# Supplementary material for: Manually segmented vascular networks from images of retina with proliferative diabetic and hypertensive retinopathy
Source: PubMed Central journal article supplement (PMC5996258; doi:10.1016/j.dib.2018.03.041), 2018-03-15
Supplement: mmc1.pdf [file mmc1.pdf]

Manuscript DIB-D-18-00421

**CONFLICTS OF INTEREST STATEMENT**

The authors declare that they have no conflicting interests.

The corresponding author signs this declaration on behalf of all the authors

Natasa Popovic, MD, PhD

Natasa Popovic MD, PhD
